# Supplementary material for: Composition regulation of Ni-BDC MOF architecture to enhance electrocatalytic urea oxidation in alkaline solution
Source: Royal Society of Chemistry journal article supplement (doi:10.1039/d4qm00550c), 2024-01-01
Supplement: d4qm00550c1.pdf [file d4qm00550c1.pdf]

## Electronic Supporting Information

### **Composition regulation of Ni-BDC MOF architecture to enhance electrocatalytic urea oxidation in alkaline solution**

Xin Fu,<sup>†a</sup> Bo Pu,<sup>†a</sup> Li Pan,<sup>a</sup> Ruiqi Ming,<sup>a</sup> Qian Lv,<sup>a</sup> Xiaobo Chen<sup>b</sup> and Lihong Tian<sup>\*a</sup>

*<sup>a</sup>Hubei Collaborative Innovation Center for Advanced Organochemical Materials, Ministry-of-Education Key Laboratory for the Synthesis and Applications of Organic Functional Molecules, Hubei University, Wuhan 430062, PR China*

*E-mail: tian7978@hubu.edu.cn*

*<sup>b</sup>Department of Chemistry, University of Missouri – Kansas City, Kansas City, Missouri 64110, USA.*

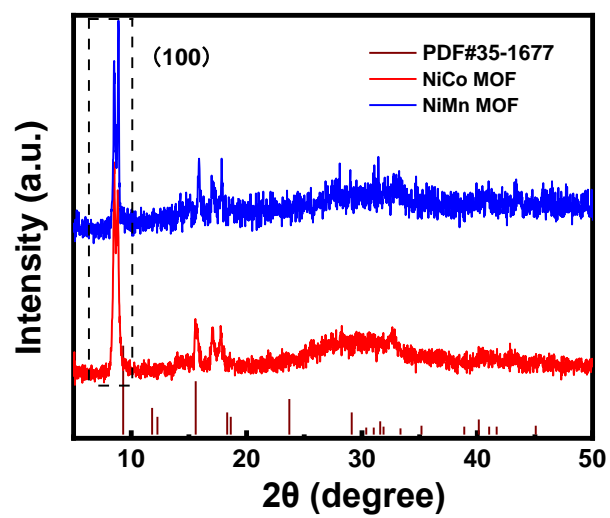

**Fig. S1** PXRD patterns of binary NiCo MOF and NiMn MOF.

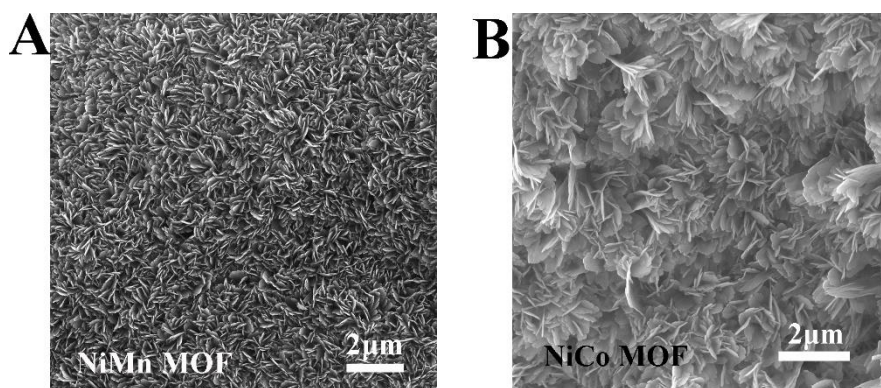

**Fig. S2** FE-SEM graphs of NiMn MOF(A) and NiCo MOF (B).

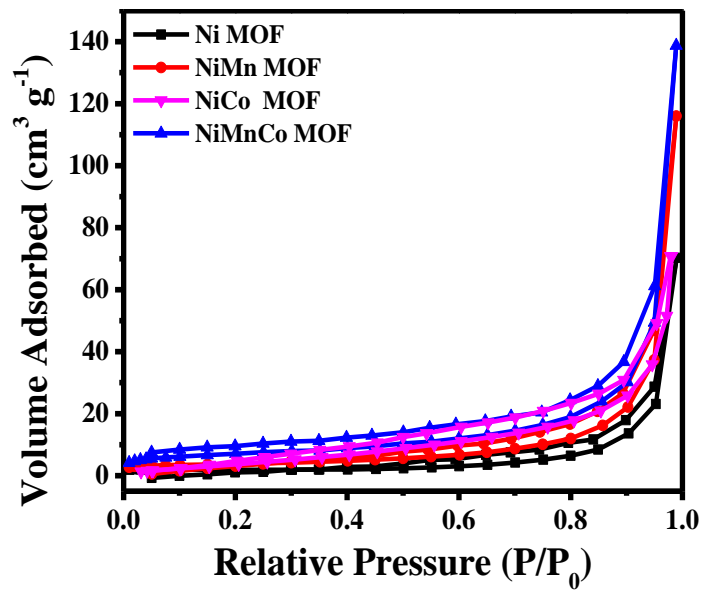

Fig. S3  $N_2$  adsorption-desorption isotherms of all samples.

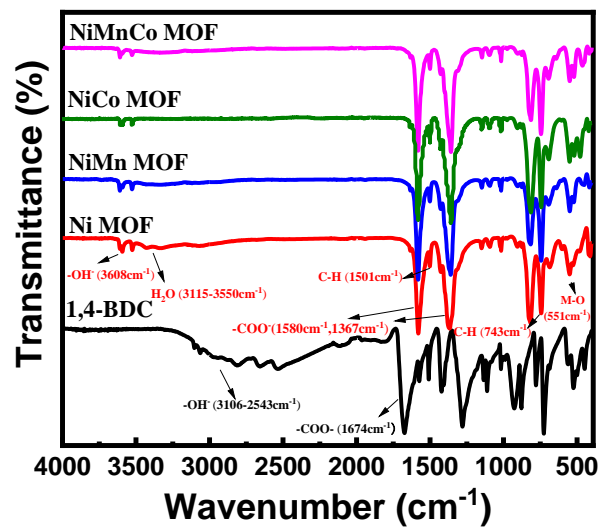

Fig. S4 FT-IR spectra of all samples.

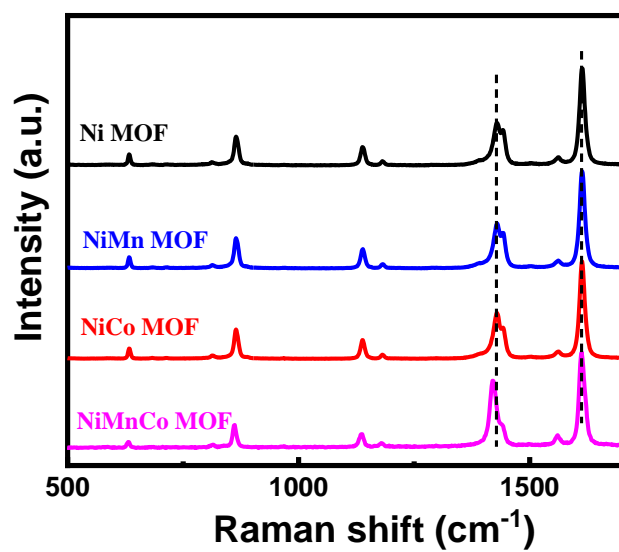

Fig. S5 Raman spectra of all samples.

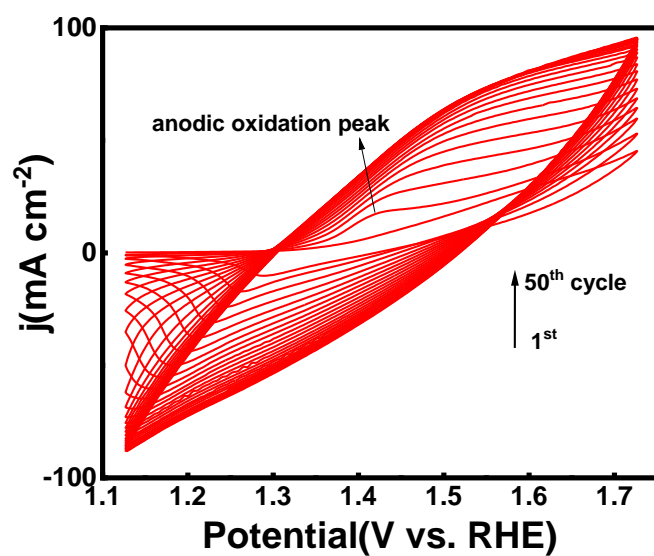

Fig. S6. Electro-chemical activation of NiMnCo MOF electrode.

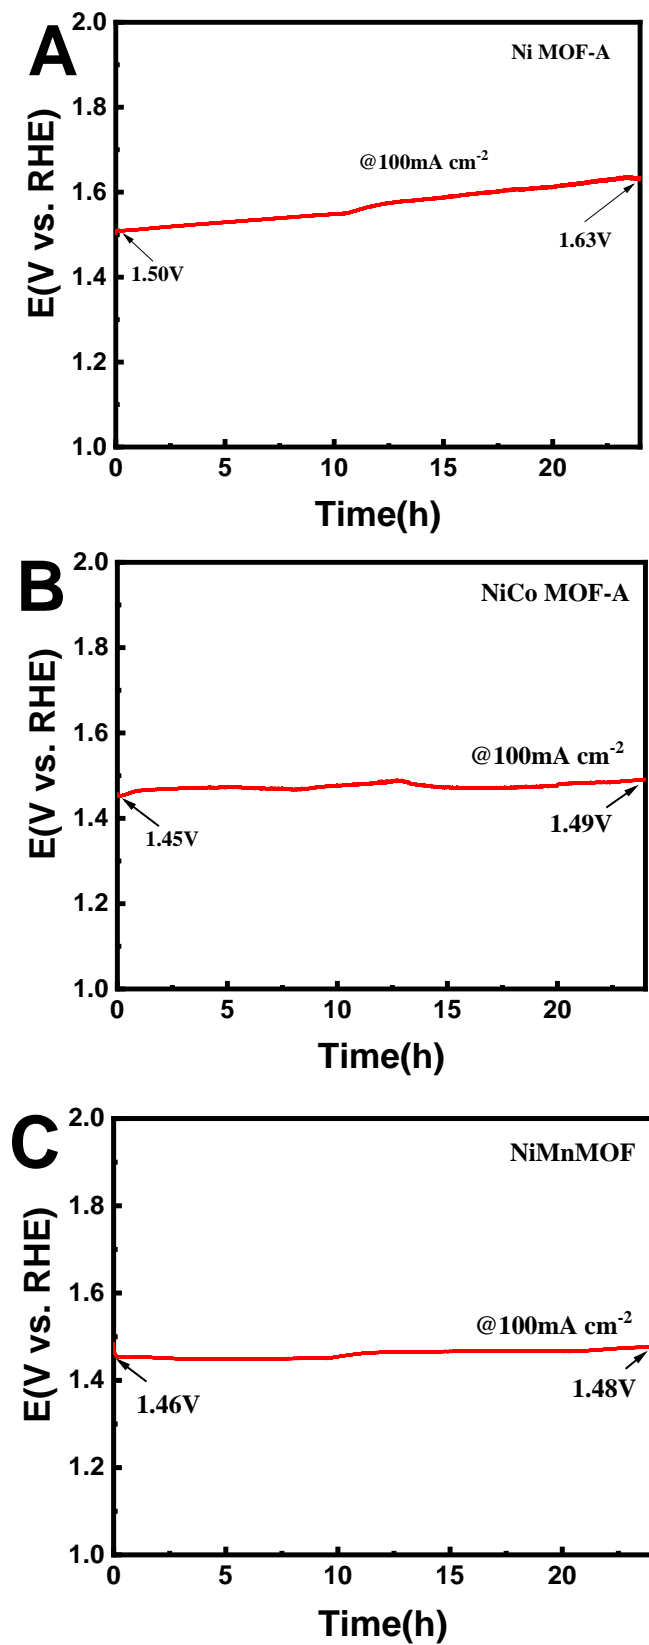

**Fig. S7.** Chronopotentiometric curves of Ni MOF-A (A), NiCo MOF-A (B) and NiMn MOF-A (C) at constant current density of 100 mA cm<sup>-2</sup>.

**Table S1.** Comparison of UOR activity of NiMnCo MOF/NF with other catalysts reported.

| Catalyst                                              | Electrolyte              | $E_j=10(\text{V})$ | Tafel slope<br>$\text{mV dec}^{-1}$ | Ref.      |
|-------------------------------------------------------|--------------------------|--------------------|-------------------------------------|-----------|
| NiMnCo MOF/NF                                         | 1.0 M KOH<br>0.33 M urea | 1.29               | 46                                  | This work |
| Fe <sub>2</sub> P@Ni <sub>x</sub> P/NF                | 1 M KOH<br>0.5 M urea    | 1.26               | 30                                  | [1]       |
| CoFeCr LDH/NF                                         | 1.0 M KOH<br>0.33 M urea | 1.31               | 85                                  | [2]       |
| O-NiMoP/NF                                            | 1 M KOH<br>0.5 M urea    | 1.31               | 35                                  | [3]       |
| Ni <sub>2</sub> P/Fe <sub>2</sub> P/NF                | 1 M KOH<br>0.5 M urea    | 1.37               | 79                                  | [4]       |
| Ni <sub>3</sub> N/NF                                  | 1 M KOH<br>0.5 M urea    | 1.34               | 41                                  | [5]       |
| Ni-Co <sub>2</sub> VO <sub>4</sub> /NF                | 1 M KOH<br>0.5 M urea    | 1.28               | 46                                  | [6]       |
| NiO-NiPi                                              | 1 M KOH<br>0.5 M urea    | 1.35               | 70.6                                | [7]       |
| P/Cr <sub>60</sub> -NiMoO <sub>4</sub>                | 1.0 M KOH<br>0.33 M urea | 1.33               | 32                                  | [8]       |
| Fe-Co <sub>0.85</sub> Se/FeCo-LDH                     | 1 M KOH<br>0.5 M urea    | 1.29               | 40                                  | [9]       |
| Fe-Ni <sub>12</sub> P <sub>5</sub> /Ni <sub>3</sub> P | 1 M KOH<br>0.5 M urea    | 1.3                | 82.8                                | [10]      |
| Ni <sub>4</sub> N/Cu <sub>3</sub> N/CF                | 1 M KOH<br>0.5 M urea    | 1.34               | 56                                  | [11]      |

[1] T. Guo, X. Xu, X. Wang, J. Zhou, H. Wang, Z. Shi, M. Huang, Enabling the full exposure of Fe<sub>2</sub>P@Ni<sub>x</sub>P heterostructures in tree-branch-like nanoarrays for promoted urea electrolysis at high current densities, *Chem. Eng. J.* 417 (2021) 128067. <https://doi.org/10.1016/j.cej.2020.128067>.

[2] Z. Wang, W. Liu, Y. Hu, M. Guan, L. Xu, H. Li, J. Bao, H. Li, Cr-doped CoFe layered double hydroxides: highly efficient and robust bifunctional electrocatalyst for the oxidation of water and urea, *Appl. Catal. B* 272 (2020) 118959. <https://doi.org/10.1016/j.apcatb.2020.118959>.

[3] H. Jiang, M. Sun, S. Wu, B. Huang, C.S. Lee, W. Zhang, Oxygen-incorporated NiMoP nanotube arrays as efficient bifunctional electrocatalysts for urea-assisted energy-saving hydrogen production in alkaline electrolyte, *Adv. Funct. Mater.* 31 (2021) 2104951.

<https://doi.org/10.1002/adfm.202104951>.

- [4] L. Yan, Y. Sun, E. Hu, J. Ning, Y. Zhong, Z. Zhang, Y. Hu, Facile in-situ growth of Ni<sub>2</sub>P/Fe<sub>2</sub>P nanohybrids on Ni foam for highly efficient urea electrolysis, *J. Colloid Interface Sci.* 541 (2019) 279-286. <https://doi.org/10.1016/j.jcis.2019.01.096>.
- [5] S. Hu, C. Feng, S. Wang, J. Liu, H. Wu, L. Zhang, J. Zhang, Ni<sub>3</sub>N/NF as bifunctional catalysts for both hydrogen generation and urea decomposition, *ACS Appl. Mater. Interfaces* 11 (2019) 13168-13175. <https://doi.org/10.1021/acsami.8b19052>.
- [6] M. Pan, G. Qian, T. Yu, J. Chen, L. Luo, Y. Zou, S. Yin, Ni modified Co<sub>2</sub>VO<sub>4</sub> heterojunction with poor/rich-electron structure for overall urea-rich wastewater oxidation, *Chem. Eng. J.* 435 (2022) 134986. <https://doi.org/10.1016/j.cej.2022.134986>.
- [7] X. Xu, T. Guo, J. Xia, B. Zhao, G. Su, H. Wang, M. Huang, A. Toghan, Modulation of the crystalline/amorphous interface engineering on Ni-P-O-based catalysts for boosting urea electrolysis at large current densities, *Chem. Eng. J.* 425 (2021) 130514. <https://doi.org/10.1016/j.cej.2021.130514>.
- [8] Y. Li, H. Guo, Y. Zhang, R. Song, Cooperative phosphorus and chromium doping induced electronic and morphological dual modulation in NiMoO<sub>4</sub> hydrate for energy-efficient urea-assisted hydrogen production, *Appl. Catal. B* 341 (2024) 123296. <https://doi.org/10.1016/j.apcatb.2023.123296>.
- [9] H. Yu, S. Zhu, Y. Hao, Y. Chang, L. Li, J. Ma, H. Chen, M. Shao, S. Peng, Modulating local interfacial bonding environment of heterostructures for energy-saving hydrogen production at high current densities, *Adv. Funct. Mater.* 33 (2023) 2212811. <https://doi.org/10.1002/adfm.202212811>.
- [10] X. Xu, C. Zhang, J. Li, H. Liu, G. Su, Z. Shi, M. Huang, Redistributing interfacial charge density of Ni<sub>12</sub>P<sub>5</sub>/Ni<sub>3</sub>P via Fe doping for ultrafast urea oxidation catalysis at large current densities, *Chem. Eng. J.* 452 (2023) 139362. <https://doi.org/10.1016/j.cej.2022.139362>.
- [11] J. Li, C. Yao, X. Kong, Z. Li, M. Jiang, F. Zhang, X. Lei, Boosting hydrogen production by electrooxidation of urea over 3D hierarchical Ni<sub>4</sub>N/Cu<sub>3</sub>N nanotube arrays, *ACS Sustainable Chem. Eng.* 7 (2019) 13278-13285. <https://doi.org/10.1021/acssuschemeng.9b02510>.

**Table S2.** Comparison of the electrocatalytic performance of NiMnCo MOF/NF||NiMnCo MOF/NF towards overall urea electrolysis in alkaline media with catalysts reported previously.

| Anode//Cathode                    | Electrolyte            | Cell voltage (V)<br>(10 mA cm <sup>-2</sup> ) | Ref.      |
|-----------------------------------|------------------------|-----------------------------------------------|-----------|
| NiMnCo MOF/NF (+/-)               | 1 M KOH<br>0.33 M urea | 1.38                                          | This work |
| FeNi-MOF NSs (+/-)                | 1 M KOH<br>0.33 M urea | 1.43                                          | [12]      |
| NiCoMOF-Fc/NF (+/-)               | 1 M KOH<br>0.33 M urea | 1.41                                          | [13]      |
| NiCo MOF/NF-EA //<br>NiCoP/NF     | 1 M KOH<br>0.33 M urea | 1.447                                         | [14]      |
| Ni-MOF-0.5/NF (+/-)               | 1 M KOH<br>0.5 M urea  | 1.52                                          | [15]      |
| MOF-Ni@MOF-Fe-S (+/-)             | 1 M KOH<br>0.5 M urea  | 1.54                                          | [16]      |
| PBA@MOF-Ni/Se (+/-)               | 1 M KOH<br>0.5 M urea  | 1.49                                          | [17]      |
| NiFe-MIL-53-NH <sub>2</sub> (+/-) | 1 M KOH<br>0.33 M urea | 1.566                                         | [18]      |

[12] X. Zhang, X. Fang, K. Zhu, W. Yuan, T. Jiang, H. Xue, J. Tian, Fe-doping induced electronic structure reconstruction in Ni-based metal-organic framework for improved energy-saving hydrogen production via urea degradation, *J. Power Sources* 520 (2022) 230882. <https://doi.org/10.1016/j.jpowsour.2021.230882>.

[13] L. Xu, X. Wang, L. Zhang, H. Sun, X. Xie, Y. Zhang, B. Tan, R. Yuan, Carboxyferrocene modulated Ni/Co bimetallic metal-organic framework for highly efficient electrocatalysis of urea oxidation reaction, *Electrochim. Acta* 428 (2022) 140877. <https://doi.org/10.1016/j.electacta.2022.140877>.

[14] D. Wei, W. Tang, N. Ma, Y. Wang, NiCo bimetal organic frames derived well-matched electrocatalyst pair for highly efficient overall urea solution electrolysis, *J. Alloys Compd.* 874 (2021) 159945. <https://doi.org/10.1016/j.jallcom.2021.159945>.

[15] S. Zheng, Y. Zheng, H. Xue, H. Pang, Ultrathin nickel terephthalate nanosheet three-dimensional aggregates with disordered layers for highly efficient overall urea electrolysis, *Chem. Eng. J.* 395 (2020) 125166. <https://doi.org/10.1016/j.cej.2020.125166>.



- [16] H. Xu, K. Ye, K. Zhu, J. Yin, J. Yan, G. Wang, D. Cao, Efficient bifunctional catalysts synthesized from three-dimensional Ni/Fe bimetallic organic frameworks for overall urea electrolysis, *Dalton Trans.* 49 (2020) 5646-5652. <https://doi.org/10.1039/d0dt00605j>.
- [17] H. Xu, K. Ye, K. Zhu, Y. Gao, J. Yin, J. Yan, G. Wang, D. Cao, Hollow bimetallic selenide derived from a hierarchical MOF-based Prussian blue analogue for urea electrolysis, *Inorg. Chem. Front.* 8 (2021) 2788-2797. <https://doi.org/10.1039/d1qi00230a>.
- [18] Z. Gao, Y. Wang, L. Xu, Q. Tao, X. Wang, Z. Zhou, Y. Luo, J. Yu, Y. Huang, Optimizing local charge distribution of metal nodes in bimetallic metal-organic frameworks for efficient urea oxidation reaction, *Chem. Eng. J.* 433 (2022) 133515. <https://doi.org/10.1016/j.cej.2021.133515>.
